# Supplementary material for: Real-world evaluation of effectiveness, persistence, and usage patterns of monotherapy and combination therapy tofacitinib in treatment of rheumatoid arthritis in Australia
Source: PubMed Central journal article supplement (PMC8724080; doi:10.1007/s10067-021-05853-x), 2021-08-09
Supplement: 10067_2021_5853_MOESM2_ESM.pdf [file 10067_2021_5853_MOESM2_ESM.pdf]

**Real-world evaluation of effectiveness, persistence, and usage patterns of monotherapy and combination therapy tofacitinib in treatment of rheumatoid arthritis in Australia**

Paul Bird<sup>1</sup>, Geoffrey Littlejohn<sup>2,3</sup>, Belinda Butcher<sup>1,4</sup>, Tegan Smith<sup>2</sup>, Catherine O'Sullivan<sup>2</sup>, David Witcombe<sup>5</sup> & Hedley Griffiths<sup>2,6</sup>

1. University of New South Wales, Kensington, New South Wales, Australia
2. OPAL Rheumatology Ltd, Sydney, New South Wales, Australia
3. Monash University, Clayton, Victoria, Australia
4. WriteSource Medical Pty Ltd, Lane Cove, New South Wales, Australia
5. Pfizer Australia, Sydney, New South Wales, Australia
6. Barwon Rheumatology Service, Geelong, Victoria, Australia

**Corresponding Author:**

Name: Catherine O'Sullivan

Email: cath.osullivan@opalrheumatology.com.au

**Online Resource 2.** Main reasons given for discontinuation of bDMARD and tofacitinib.

| Reasons for discontinuation         | Monotherapy            |                       | Combination therapy     |                       |
|-------------------------------------|------------------------|-----------------------|-------------------------|-----------------------|
|                                     | bDMARD                 | Tofacitinib           | bDMARD                  | Tofacitinib           |
| Better alternative                  | 20.4%<br>(n = 168/823) | 14.8%<br>(n = 40/271) | 14.5%<br>(n = 141/972)  | 5.9%<br>(n= 23/388)   |
| Lack of efficacy                    | 14.8%<br>(n = 122/823) | 24.7%<br>(n = 67/271) | 15.3%<br>(n = 149/972), | 12.1%<br>(n= 87/388)  |
| Adverse reaction                    | 12.8%<br>(n = 105/823) | 14.0%<br>(n = 38/271) | 11.4%<br>(n = 111/973)  | 10.3%<br>(n = 40/388) |
| Lack of efficacy, secondary failure | 8.7%<br>(n =72/823)    | 9.6%<br>(n = 26/271)  | 11.3%<br>(n = 110/972)  | 22.4%<br>(n= 87/388)  |
